35. Limjunyawong N, Fallica J, Horton MR, Mitzner W: Measurement of the pressure-volume curve in mouse lungs. *J Vis Exp JoVE* 2015:52376
36. Szabari MV, Parameswaran H, Sato S, Hantos Z, Bartolák-Suki E, Suki B: Acute mechanical forces cause deterioration in lung structure and function in elastase-induced emphysema. *Am J Physiol Lung Cell Mol Physiol* 2012; 303:L567-74
37. Chiumello D, Carlesso E, Cadringer P, Caironi P, Valenza F, Polli F, Tallarini F, Cozzi P, Cressoni M, Colombo A, Marini JJ, Gattinoni L: Lung stress and strain during mechanical ventilation for acute respiratory distress syndrome. *Am J Respir Crit Care Med* 2008; 178:346-55
38. Suki B, Stamenović D, Hubmayr R: Lung parenchymal mechanics. *Compr Physiol* 2011; 1:1317-51
39. Göggel R, Winoto-Morbach S, Vielhaber G, Imai Y, Lindner K, Brade L, Brade H, Ehlers S, Slutsky AS, Schütze S, Gulbins E, Uhlig S: PAF-mediated pulmonary edema: A new role for acid sphingomyelinase and ceramide. *Nat Med* 2004; 10:155-60

## ANESTHESIOLOGY REFLECTIONS FROM THE WOOD LIBRARY-MUSEUM

### Dr. Adoniram J. Shurtleff: How “Uncle Ad” Became an “Ad” Against Self-Administration of Anesthesia

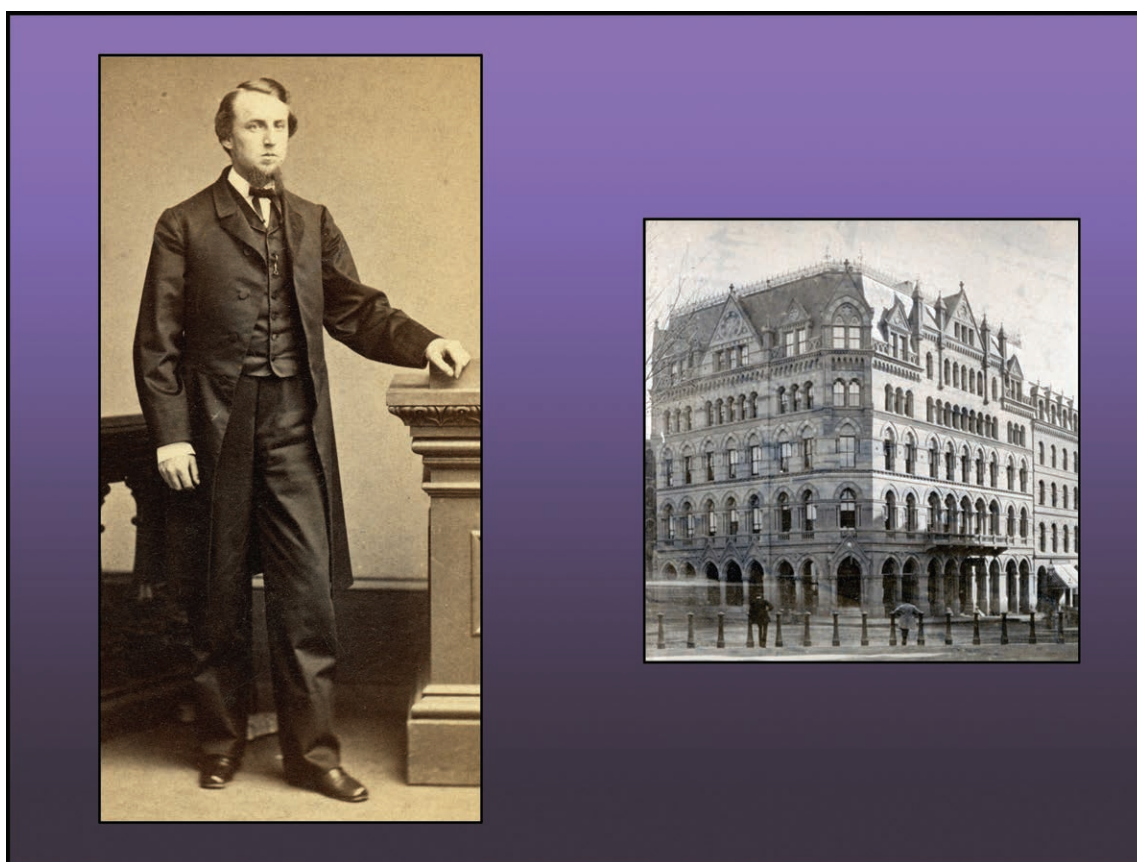

Affectionately called “Uncle Ad” by his nieces and nephews, Dr. Adoniram J. Shurtleff (1841 to 1885, *left*) had expanded his Massachusetts dental practice from the town of Natick to an office at Boston’s Hotel Boylston (*right*). Shortly after 6 PM on February 26, 1885, a close friend had followed Dr. Shurtleff’s instructions and had administered a proprietary brand of nitrous oxide to the 43-year-old dentist, who, ironically, was suffering from a severe toothache. At 10 PM the janitor discovered “the doctor lying upon the floor dead,” and “the body was not cold.” The dead man’s left hand clutched a piece of tubing “with one end of it held tightly between the teeth [and] the other of course attached to the cylinder,” which was “completely empty of [laughing] gas.” A few months after Shurtleff’s death, a leading dental authority, Dr. Albion Dudley, published a wise admonition: “No dentist should ever undertake to administer an anesthetic to himself under any circumstances.” (Copyright © the American Society of Anesthesiologists’ Wood Library-Museum of Anesthesiology.)

*George S. Bause, M.D., M.P.H., Honorary Curator and Laureate of the History of Anesthesia, Wood Library-Museum of Anesthesiology, Schaumburg, Illinois, and Clinical Associate Professor, Case Western Reserve University, Cleveland, Ohio. UJYC@aol.com.*
